# Supplementary material for: High risk of SARS-CoV-2 infection among frontline healthcare workers in Northeast Brazil: a respondent-driven sampling approach
Source: bioRxiv or medRxiv preprint supplement (doi:10.1101/2021.10.08.21264755), 2021-10-13
Supplement: Supplementary file [file media-1.pdf]

**Supplementary Table 1. Characteristics of the study population according to RT-PCR testing**

|                                                                  |                    | RT-PCR testing |            | P-value |
|------------------------------------------------------------------|--------------------|----------------|------------|---------|
|                                                                  |                    | Yes (%)        | No (%)     |         |
| <b>Occupation category</b>                                       |                    |                |            | 0.02    |
|                                                                  | Physician          | 269 (51.1)     | 257 (48.9) |         |
|                                                                  | Registered nurse   | 224(47.6)      | 247(52.4)  |         |
|                                                                  | Nursing assistant  | 110 (42.0)     | 152 (58.0) |         |
|                                                                  | Physical therapist | 108(41.2)      | 154(58.8)  |         |
| <b>Sex</b>                                                       |                    |                |            | 0.43    |
|                                                                  | Female             | 530 (46.2)     | 618 (53.8) |         |
|                                                                  | Male               | 181 (48.5)     | 192 (51.5) |         |
| <b>Age group, years</b>                                          |                    |                |            | 0.15    |
|                                                                  | < 30               | 523 (45.7)     | 622 (54.3) |         |
|                                                                  | ≥ 30               | 188 (50.0)     | 188 (50.0) |         |
| <b>Any comorbidity</b>                                           |                    |                |            | < 0.001 |
|                                                                  | Yes                | 246 (56.8)     | 187 (43.2) |         |
|                                                                  | No                 | 465 (42.7)     | 623 (57.3) |         |
| <b>Number of workplaces (hospitals/clinics)</b>                  |                    |                |            | < 0.01  |
|                                                                  | <3                 | 247 (54.0)     | 210 (46.0) |         |
|                                                                  | ≥3                 | 462 (43.5)     | 599 (56.5) |         |
| <b>Work setting</b>                                              |                    |                |            | 0.39    |
|                                                                  | Emerg/ICU          | 565 (47.3)     | 629 (52.7) |         |
|                                                                  | Outpat/Inpatients  | 146 (44.7)     | 181 (55.3) |         |
| <b>Institution provider</b>                                      |                    |                |            | < 0.001 |
|                                                                  | Private            | 48 (42.1)      | 66 (57.9)  |         |
|                                                                  | Public             | 393 (43.0)     | 522 (57.0) |         |
|                                                                  | Both               | 270 (54.9)     | 222 (45.1) |         |
| <b>Performed aerosol generating procedure</b>                    |                    |                |            | 0.36    |
|                                                                  | Yes                | 600 (47.3)     | 669 (52.7) |         |
|                                                                  | No                 | 110 (44.5)     | 137 (55.5) |         |
|                                                                  | Missing            | 1 (20.0)       | 4 (80.0)   |         |
| <b>Same N95 respirator, use duration, days</b>                   |                    |                |            | 0.023   |
|                                                                  | ≤ 7                | 458 (49.00)    | 476 (51.0) |         |
|                                                                  | > 7                | 243 (43.0)     | 322 (57.0) |         |
| <b>Self-perceived risk</b>                                       |                    |                |            | 0.85    |
|                                                                  | None/Low           | 36 (45.1)      | 43 (54.9)  |         |
|                                                                  | Medium/High        | 665 (46.7)     | 760 (53.3) |         |
| <b>Accident involving biological fluid/respiratory secretion</b> |                    |                |            | 0.644   |
|                                                                  | Yes                | 84 (45.2)      | 102 (54.8) |         |
|                                                                  | No                 | 627 (47.0)     | 708 (53.0) |         |
| <b>Sick leave due to COVID-19 symptoms</b>                       |                    |                |            | < 0.001 |
|                                                                  | Yes                | 576 (79.7)     | 147 (20.3) |         |
|                                                                  | No                 | 130 (16.5)     | 659 (83.5) |         |
| <b>Had COVID-19-like symptoms/signs</b>                          |                    |                |            | < 0.001 |
|                                                                  | Yes                | 601 (68.2)     | 280 (31.8) |         |
|                                                                  | No                 | 110 (17.0)     | 530 (82.8) |         |

COVID-19, coronavirus disease 2019; RT-PCR, reverse transcription polymerase chain reaction
